# Supplementary material for: PAA-g-PLA amphiphilic graft copolymer: synthesis, self-assembly, and drug loading ability
Source: Royal Society of Chemistry journal article supplement (doi:10.1039/c7py00762k), 2017-01-01
Supplement: c7py00762k1.pdf [file c7py00762k1.pdf]

Supporting information for

**PAA-g-PLA Amphiphilic Graft Copolymer: Synthesis,  
Self-Assembly, and Drug Loading Ability**

Wenhao Qian,<sup>1</sup> Tao Song,<sup>1</sup> Mao Ye,<sup>1</sup> Peicheng Xu,<sup>1,\*</sup> Guolin Lu,<sup>2</sup> Xiaoyu Huang<sup>2,\*</sup>

<sup>1</sup> Department of Stomatology, Shanghai Xuhui District Dental Center, 685 Zhaojiabang Road, Shanghai 200032, People's Republic of China

<sup>2</sup> Key Laboratory of Synthetic and Self-Assembly Chemistry for Organic Functional Molecules, Shanghai Institute of Organic Chemistry, Chinese Academy of Sciences, 345 Lingling Road, Shanghai 200032, People's Republic of China

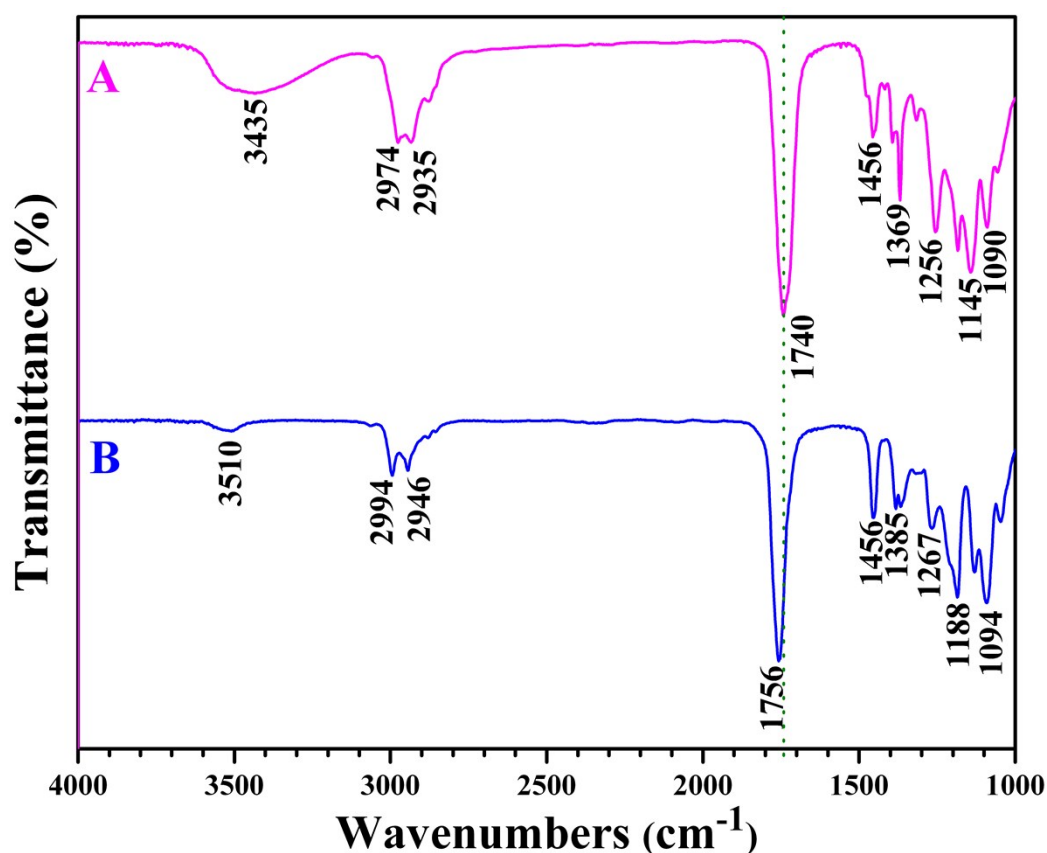

Figure S1. FT-IR spectra of PtBHBMA 1 (A) and PtBA-g-PLA 2 (B).
